# Supplementary material for: Evaluation of Parameters for High Efficiency Transformation of Acinetobacter baumannii
Source: PubMed Central journal article supplement (PMC4766488; doi:10.1038/srep22110), 2016-02-25
Supplement: srep22110-s1.pdf [file srep22110-s1.pdf]

## **Supplementary Information**

### **Evaluation of Parameters for High Efficiency Transformation of *Acinetobacter baumannii***

Suleyman Yildirim<sup>a\*§</sup>, Mitchell G. Thompson<sup>a</sup>, Anna C. Jacobs<sup>a</sup>, Daniel V.  
Zurawski<sup>a</sup>, Benjamin C. Kirkup Jr.<sup>a,b¶</sup>,

<sup>a</sup> Department of Wound Infections, Bacterial Diseases Walter Reed Army Institute of Research,  
Silver Spring, Maryland, USA

<sup>b</sup> Department of Medicine, Infectious Diseases Division, Uniformed Services University of the  
Health Sciences, F. Edward Hebert School of Medicine, Bethesda, Maryland, USA

\*Suleyman Yildirim: [suleymanyildirim@medipol.edu.tr](mailto:suleymanyildirim@medipol.edu.tr)

§Present addresses:

Medipol University School of Medicine  
Department of Medical Microbiology  
Beykoz, Istanbul 34810

¶Center for Biomolecular Science and Engineering  
Naval Research Labs,  
4555 Overlook Ave SW, Washington DC 20375.

**Supplemental Table S1. Transformation efficiency in replicate run of DOE1**

| Run# | OD600 | V(kV/cm) | R (Ohms) | [DNA]<br>ng | [Mg <sup>++</sup> ] (mM) | Transformants/ $\mu$ g DNA | AVERAGE<br>(n=3) | STDEV    |
|------|-------|----------|----------|-------------|--------------------------|----------------------------|------------------|----------|
| 1    | 4.5   | 10       | 400      | 100         | 0.5                      | 7.83E+05                   | 8.51E+05         | 8.61E+04 |
| 2    | 4.5   | 10       | 400      | 100         | 0.5                      | 8.23E+05                   |                  |          |
| 3    | 4.5   | 10       | 400      | 100         | 0.5                      | 9.48E+05                   |                  |          |
| 4    | 0.1   | 10       | 100      | 100         | 2                        | 1.00E+04                   | 1.03E+04         | 5.77E+02 |
| 5    | 0.1   | 10       | 100      | 100         | 2                        | 1.00E+04                   |                  |          |
| 6    | 0.1   | 10       | 100      | 100         | 2                        | 1.10E+04                   |                  |          |
| 7    | 4.5   | 10       | 100      | 25          | 2                        | 0.00E+00                   | 0.00E+00         | 0.00E+00 |
| 8    | 4.5   | 10       | 100      | 25          | 2                        | 0.00E+00                   |                  |          |
| 9    | 4.5   | 10       | 100      | 25          | 2                        | 0.00E+00                   |                  |          |
| 10   | 0.1   | 10       | 400      | 25          | 0.5                      | 5.60E+04                   | 4.80E+04         | 8.00E+03 |
| 11   | 0.1   | 10       | 400      | 25          | 0.5                      | 4.80E+04                   |                  |          |
| 12   | 0.1   | 10       | 400      | 25          | 0.5                      | 4.00E+04                   |                  |          |
| 13   | 0.1   | 18       | 400      | 25          | 2                        | 0.00E+00                   | 0.00E+00         | 0.00E+00 |
| 14   | 0.1   | 18       | 400      | 25          | 2                        | 0.00E+00                   |                  |          |
| 15   | 0.1   | 18       | 400      | 25          | 2                        | 0.00E+00                   |                  |          |
| 16   | 4.5   | 18       | 100      | 25          | 0.5                      | 2.62E+05                   | 9.65E+05         | 6.10E+05 |
| 17   | 4.5   | 18       | 100      | 25          | 0.5                      | 1.35E+06                   |                  |          |
| 18   | 4.5   | 18       | 100      | 25          | 0.5                      | 1.28E+06                   |                  |          |
| 19   | 0.1   | 18       | 100      | 100         | 0.5                      | 3.40E+04                   | 4.17E+04         | 6.66E+03 |
| 20   | 0.1   | 18       | 100      | 100         | 0.5                      | 4.50E+04                   |                  |          |
| 21   | 0.1   | 18       | 100      | 100         | 0.5                      | 4.60E+04                   |                  |          |
| 22   | 4.5   | 18       | 400      | 100         | 2                        | 3.00E+02                   | 4.10E+03         | 6.84E+03 |
| 23   | 4.5   | 18       | 400      | 100         | 2                        | 0.00E+00                   |                  |          |
| 24   | 4.5   | 18       | 400      | 100         | 2                        | 1.20E+04                   |                  |          |
| 25   | 0.5   | 14       | 200      | 50          | 1                        | 2.00E+04                   | 2.27E+04         | 2.31E+03 |
| 26   | 0.5   | 14       | 200      | 50          | 1                        | 2.40E+04                   |                  |          |
| 27   | 0.5   | 14       | 200      | 50          | 1                        | 2.40E+04                   |                  |          |

**Supplemental Table S2. Transformation efficiency in replicate run of DOE2**

| Run# | OD600 | V (kV/cm) | R (Ohms) | DNA (ng) | [Mg <sup>++</sup> ] (mM) | Transformants/ $\mu$ g DNA | AVERAGE (n=3) | STDEV    |
|------|-------|-----------|----------|----------|--------------------------|----------------------------|---------------|----------|
| 1    | 6     | 10        | 300      | 100      | 0                        | 1.91E+07                   | 2.33E+07      | 4.11E+06 |
| 2    | 6     | 10        | 300      | 100      | 0                        | 2.36E+07                   |               |          |
| 3    | 6     | 10        | 300      | 100      | 0                        | 2.73E+07                   |               |          |
| 4    | 2     | 10        | 100      | 100      | 0.5                      | 8.98E+06                   | 1.21E+07      | 5.32E+06 |
| 5    | 2     | 10        | 100      | 100      | 0.5                      | 1.82E+07                   |               |          |
| 6    | 2     | 10        | 100      | 100      | 0.5                      | 8.98E+06                   |               |          |
| 7    | 6     | 10        | 100      | 25       | 0.5                      | 5.20E+04                   | 6.27E+04      | 2.57E+04 |
| 8    | 6     | 10        | 100      | 25       | 0.5                      | 4.40E+04                   |               |          |
| 9    | 6     | 10        | 100      | 25       | 0.5                      | 9.20E+04                   |               |          |
| 10   | 2     | 10        | 300      | 25       | 0                        | 3.59E+07                   | 4.82E+07      | 2.13E+07 |
| 11   | 2     | 10        | 300      | 25       | 0                        | 7.28E+07                   |               |          |
| 12   | 2     | 10        | 300      | 25       | 0                        | 3.59E+07                   |               |          |
| 13   | 2     | 18        | 300      | 25       | 0.5                      | 1.35E+06                   | 1.41E+06      | 5.11E+04 |
| 14   | 2     | 18        | 300      | 25       | 0.5                      | 1.42E+06                   |               |          |
| 15   | 2     | 18        | 300      | 25       | 0.5                      | 1.45E+06                   |               |          |
| 16   | 6     | 18        | 100      | 25       | 0                        | 4.28E+08                   | 4.44E+08      | 1.60E+07 |
| 17   | 6     | 18        | 100      | 25       | 0                        | 4.44E+08                   |               |          |
| 18   | 6     | 18        | 100      | 25       | 0                        | 4.60E+08                   |               |          |
| 19   | 2     | 18        | 100      | 100      | 0                        | 2.83E+07                   | 2.61E+07      | 7.06E+06 |
| 20   | 2     | 18        | 100      | 100      | 0                        | 3.18E+07                   |               |          |
| 21   | 2     | 18        | 100      | 100      | 0                        | 1.82E+07                   |               |          |
| 22   | 6     | 18        | 300      | 100      | 0.5                      | 1.11E+06                   | 9.33E+05      | 1.65E+05 |
| 23   | 6     | 18        | 300      | 100      | 0.5                      | 9.05E+05                   |               |          |
| 24   | 6     | 18        | 300      | 100      | 0.5                      | 7.83E+05                   |               |          |
| 25   | 4.5   | 14        | 200      | 50       | 0.1                      | 7.20E+06                   | 6.89E+06      | 2.80E+05 |
| 26   | 4.5   | 14        | 200      | 50       | 0.1                      | 6.80E+06                   |               |          |
| 27   | 4.5   | 14        | 200      | 50       | 0.1                      | 6.66E+06                   |               |          |
